# Supplementary material
Source: PubMed Central journal article supplement (PMC3001685)
Supplement: NIHMS243153-supplement-01.pdf [file NIHMS243153-supplement-01.pdf]

## Supplemental Information

**Table S1.** Summary of demographics for control and schizophrenia groups

|                                        | <b>Control group</b><br>(n = 37)  | <b>Schizophrenia group</b><br>(n = 37)                                                                                                                |
|----------------------------------------|-----------------------------------|-------------------------------------------------------------------------------------------------------------------------------------------------------|
| Age (years)                            | 51.1 (18-78)                      | 51.3 (27-75)                                                                                                                                          |
| Gender                                 | 7F, 30M                           | 13F, 24M                                                                                                                                              |
| Hemisphere                             | 23R, 14L                          | 17R, 20L                                                                                                                                              |
| pH                                     | 6.66 +/- 0.29                     | 6.61 +/- 0.30                                                                                                                                         |
| PMI (hrs)                              | 24.8 +/- 10.97                    | 28.8 +/- 14.07                                                                                                                                        |
| RIN                                    | 7.3 +/- 0.57                      | 7.3 +/- 0.58                                                                                                                                          |
| Manner of death                        | natural = 37                      | natural = 29, suicide = 8                                                                                                                             |
| Subclass                               | -                                 | paranoid = 16; undifferentiated = 7;<br>disorganized = 5; residual = 2;<br>schizoaffective, depressive type = 4;<br>schizoaffective, bipolar type = 3 |
| Age of onset (years)                   | -                                 | 23.7 ± 0.10                                                                                                                                           |
| Duration of illness (years)            | -                                 | 27.6 ± 2.3                                                                                                                                            |
| Daily chlorpromazine mean (mg)         | -                                 | 692 ± 502                                                                                                                                             |
| Last recorded chlorpromazine dose (mg) | -                                 | 542 ± 374                                                                                                                                             |
| Lifetime chlorpromazine dose (g)       | -                                 | 7908 ± 7954                                                                                                                                           |
| Daily alcohol consumption              | yes = 19, no = 7,<br>unknown = 11 | yes = 21, no = 13,<br>unknown = 3                                                                                                                     |

F, female; L, left; M, male; PMI, postmortem interval; R, right; RIN, RNA integrity number.

This cohort is described in detail by Weickert *et al.* (1).

**Table S2.** Correlation of independent variables and gene expression

|                      | Gene      | pH           |             | RIN          |             | age          |             | PMI          |             |
|----------------------|-----------|--------------|-------------|--------------|-------------|--------------|-------------|--------------|-------------|
|                      |           | r            | p           | r            | p           | r            | p           | r            | p           |
| <b>Whole cohort</b>  | CPLX1     | 0.08         | 0.53        | 0.00         | 0.98        | -0.08        | 0.50        | 0.11         | 0.35        |
|                      | VGAT      | <b>0.57</b>  | <b>0.00</b> | <b>0.32</b>  | <b>0.01</b> | <b>-0.37</b> | <b>0.00</b> | 0.07         | 0.58        |
|                      | CPLX2     | -0.17        | 0.17        | -0.13        | 0.28        | -0.11        | 0.36        | 0.15         | 0.23        |
|                      | VGluT1    | <b>0.57</b>  | <b>0.00</b> | <b>0.50</b>  | <b>0.00</b> | <b>-0.54</b> | <b>0.00</b> | <b>0.28</b>  | <b>0.02</b> |
|                      | GAP43     | 0.02         | 0.87        | -0.02        | 0.89        | -0.08        | 0.51        | 0.02         | 0.84        |
|                      | NAV1      | <b>-0.24</b> | <b>0.05</b> | 0.03         | 0.82        | -0.15        | 0.22        | -0.23        | 0.06        |
|                      | NAV2      | <b>-0.47</b> | <b>0.00</b> | <b>-0.54</b> | <b>0.00</b> | <b>0.26</b>  | <b>0.03</b> | -0.21        | 0.08        |
|                      | VAMP1     | -0.09        | 0.48        | 0.00         | 0.99        | <b>0.35</b>  | <b>0.00</b> | -0.10        | 0.40        |
|                      | dysbindin | <b>-0.26</b> | <b>0.03</b> | -0.07        | 0.57        | <b>0.25</b>  | <b>0.04</b> | -0.10        | 0.41        |
| <b>Controls</b>      | CPLX1     | 0.07         | 0.68        | -0.04        | 0.80        | -0.18        | 0.29        | -0.01        | 0.97        |
|                      | VGAT      | <b>0.53</b>  | <b>0.00</b> | 0.03         | 0.86        | <b>-0.38</b> | <b>0.03</b> | 0.23         | 0.20        |
|                      | CPLX2     | <b>-0.43</b> | <b>0.01</b> | -0.32        | 0.06        | -0.13        | 0.44        | -0.03        | 0.87        |
|                      | VGluT1    | <b>0.61</b>  | <b>0.00</b> | 0.31         | 0.07        | <b>-0.54</b> | <b>0.00</b> | 0.27         | 0.11        |
|                      | GAP43     | -0.16        | 0.35        | -0.16        | 0.35        | -0.18        | 0.31        | -0.06        | 0.75        |
|                      | NAV1      | -0.21        | 0.21        | 0.11         | 0.52        | -0.14        | 0.43        | -0.22        | 0.19        |
|                      | NAV2      | <b>-0.50</b> | <b>0.00</b> | <b>-0.50</b> | <b>0.00</b> | 0.10         | 0.55        | <b>-0.35</b> | <b>0.04</b> |
|                      | VAMP1     | <b>-0.32</b> | <b>0.05</b> | -0.08        | 0.64        | <b>0.44</b>  | <b>0.01</b> | <b>-0.45</b> | <b>0.01</b> |
|                      | dysbindin | <b>-0.50</b> | <b>0.00</b> | -0.27        | 0.11        | <b>0.41</b>  | <b>0.01</b> | -0.19        | 0.26        |
| <b>Schizophrenia</b> | CPLX1     | 0.08         | 0.66        | 0.05         | 0.78        | 0.03         | 0.86        | 0.28         | 0.10        |
|                      | VGAT      | <b>0.62</b>  | <b>0.00</b> | <b>0.54</b>  | <b>0.00</b> | <b>-0.38</b> | <b>0.03</b> | 0.00         | 0.99        |
|                      | CPLX2     | 0.07         | 0.68        | 0.05         | 0.78        | -0.09        | 0.63        | <b>0.35</b>  | <b>0.05</b> |
|                      | VGluT1    | <b>0.54</b>  | <b>0.00</b> | <b>0.69</b>  | <b>0.00</b> | <b>-0.54</b> | <b>0.00</b> | 0.29         | 0.08        |
|                      | GAP43     | 0.17         | 0.34        | 0.15         | 0.39        | 0.00         | 0.98        | 0.21         | 0.25        |
|                      | NAV1      | <b>-0.33</b> | <b>0.05</b> | -0.09        | 0.60        | -0.15        | 0.38        | -0.20        | 0.25        |
|                      | NAV2      | <b>-0.44</b> | <b>0.01</b> | <b>-0.59</b> | <b>0.00</b> | <b>0.44</b>  | <b>0.01</b> | -0.11        | 0.54        |
|                      | VAMP1     | 0.12         | 0.49        | 0.08         | 0.66        | 0.27         | 0.11        | 0.19         | 0.28        |
|                      | dysbindin | -0.11        | 0.53        | 0.05         | 0.78        | 0.15         | 0.39        | -0.04        | 0.83        |

Bolded values indicate significant correlations ( $p \leq 0.05$ ).

PMI, postmortem interval; RIN, RNA integrity number.

**Table S3.** Correlations between synaptic markers

| <b>Controls</b>       |              |             |             |             |              |             |              |             |              |             |             |             |             |             |              |             |                  |             |
|-----------------------|--------------|-------------|-------------|-------------|--------------|-------------|--------------|-------------|--------------|-------------|-------------|-------------|-------------|-------------|--------------|-------------|------------------|-------------|
|                       | <b>CPLX1</b> |             | <b>VGAT</b> |             | <b>CPLX2</b> |             | <b>VGLUT</b> |             | <b>GAP43</b> |             | <b>NAV1</b> |             | <b>NAV2</b> |             | <b>VAMP1</b> |             | <b>dysbindin</b> |             |
|                       | <b>r</b>     | <b>p</b>    | <b>r</b>    | <b>p</b>    | <b>r</b>     | <b>p</b>    | <b>r</b>     | <b>p</b>    | <b>r</b>     | <b>p</b>    | <b>r</b>    | <b>p</b>    | <b>r</b>    | <b>p</b>    | <b>r</b>     | <b>p</b>    | <b>r</b>         | <b>p</b>    |
| CPLX1                 | -            | -           | 0.32        | 0.10        | 0.59         | <b>0.00</b> | 0.35         | 0.04        | 0.58         | <b>0.00</b> | 0.00        | 0.98        | 0.02        | 0.89        | 0.28         | 0.10        | 0.15             | 0.38        |
| VGAT                  | 0.32         | 0.07        | -           | -           | -0.06        | 0.76        | 0.61         | <b>0.00</b> | -0.01        | 0.95        | -0.50       | <b>0.00</b> | -0.30       | 0.10        | 0.09         | 0.61        | -0.38            | <b>0.03</b> |
| CPLX2                 | 0.59         | <b>0.00</b> | -0.06       | 0.76        | -            | -           | -0.09        | 0.62        | 0.70         | <b>0.00</b> | 0.15        | 0.39        | 0.39        | <b>0.02</b> | 0.17         | 0.34        | 0.29             | 0.09        |
| VGLUT                 | 0.35         | <b>0.04</b> | 0.61        | <b>0.00</b> | -0.09        | 0.62        | -            | -           | 0.24         | 0.17        | -0.12       | 0.50        | -0.45       | <b>0.01</b> | -0.45        | <b>0.01</b> | -0.37            | <b>0.03</b> |
| GAP43                 | 0.58         | <b>0.00</b> | -0.01       | 0.95        | 0.70         | <b>0.00</b> | 0.24         | 0.17        | -            | -           | 0.22        | 0.21        | 0.30        | 0.08        | -0.07        | 0.70        | 0.31             | 0.08        |
| NAV1                  | 0.00         | 0.98        | -0.50       | <b>0.00</b> | 0.15         | 0.39        | -0.12        | 0.50        | 0.22         | 0.21        | -           | -           | 0.23        | 0.19        | 0.03         | 0.87        | 0.28             | 0.11        |
| NAV2                  | 0.02         | 0.89        | -0.30       | 0.10        | 0.39         | <b>0.02</b> | -0.45        | <b>0.01</b> | 0.30         | 0.08        | 0.23        | 0.19        | -           | -           | 0.25         | 0.15        | 0.41             | <b>0.02</b> |
| VAMP1                 | 0.28         | 0.10        | 0.09        | 0.61        | 0.17         | 0.34        | -0.45        | <b>0.01</b> | -0.07        | 0.70        | 0.03        | 0.87        | 0.25        | 0.15        | -            | -           | 0.27             | 0.11        |
| dysbindin             | 0.15         | 0.38        | -0.38       | <b>0.03</b> | 0.29         | 0.09        | -0.37        | <b>0.03</b> | 0.31         | 0.08        | 0.28        | 0.11        | 0.41        | <b>0.02</b> | 0.27         | 0.11        | -                | -           |
| <b>Schizophrenics</b> |              |             |             |             |              |             |              |             |              |             |             |             |             |             |              |             |                  |             |
|                       | <b>CPLX1</b> |             | <b>VGAT</b> |             | <b>CPLX2</b> |             | <b>VGLUT</b> |             | <b>GAP43</b> |             | <b>NAV1</b> |             | <b>NAV2</b> |             | <b>VAMP1</b> |             | <b>dysbindin</b> |             |
|                       | <b>r</b>     | <b>p</b>    | <b>r</b>    | <b>p</b>    | <b>r</b>     | <b>p</b>    | <b>r</b>     | <b>p</b>    | <b>r</b>     | <b>p</b>    | <b>r</b>    | <b>p</b>    | <b>r</b>    | <b>p</b>    | <b>r</b>     | <b>p</b>    | <b>r</b>         | <b>p</b>    |
| CPLX1                 | -            | -           | 0.13        | 0.47        | 0.76         | <b>0.00</b> | 0.24         | 0.16        | 0.71         | <b>0.00</b> | 0.31        | 0.08        | 0.15        | 0.41        | 0.67         | <b>0.00</b> | 0.58             | <b>0.00</b> |
| VGAT                  | 0.11         | 0.53        | -           | -           | -0.02        | 0.90        | 0.74         | <b>0.00</b> | 0.01         | 0.94        | -0.07       | 0.72        | -0.21       | 0.25        | -0.20        | 0.26        | -0.22            | 0.21        |
| CPLX2                 | 0.76         | <b>0.00</b> | -0.02       | 0.90        | -            | -           | 0.17         | 0.35        | 0.57         | <b>0.00</b> | -0.09       | 0.61        | -0.08       | 0.68        | 0.57         | <b>0.00</b> | 0.40             | <b>0.02</b> |
| VGLUT                 | 0.24         | 0.17        | 0.74        | <b>0.00</b> | 0.17         | 0.35        | -            | -           | 0.30         | 0.09        | -0.11       | 0.55        | -0.48       | <b>0.00</b> | -0.02        | 0.91        | -0.10            | 0.58        |
| GAP43                 | 0.71         | <b>0.00</b> | 0.01        | 0.94        | 0.57         | <b>0.00</b> | 0.30         | 0.09        | -            | -           | 0.29        | 0.11        | 0.07        | 0.70        | 0.53         | <b>0.00</b> | 0.60             | <b>0.00</b> |
| NAV1                  | 0.31         | 0.08        | -0.07       | 0.72        | -0.09        | 0.61        | -0.11        | 0.55        | 0.29         | 0.11        | -           | -           | 0.21        | 0.26        | 0.00         | 0.98        | 0.50             | <b>0.00</b> |
| NAV2                  | 0.15         | 0.41        | -0.21       | 0.25        | -0.08        | 0.68        | -0.48        | <b>0.00</b> | 0.07         | 0.70        | 0.21        | 0.26        | -           | -           | 0.02         | 0.89        | 0.28             | 0.11        |
| VAMP1                 | 0.70         | <b>0.00</b> | -0.20       | 0.26        | 0.57         | <b>0.00</b> | -0.02        | 0.91        | 0.53         | <b>0.00</b> | 0.00        | 0.98        | 0.02        | 0.89        | -            | -           | 0.55             | <b>0.00</b> |
| dysbindin             | 0.58         | <b>0.00</b> | -0.22       | 0.21        | 0.40         | <b>0.02</b> | -0.10        | 0.58        | 0.60         | <b>0.00</b> | 0.50        | <b>0.00</b> | 0.28        | 0.11        | 0.55         | <b>0.00</b> | -                | -           |

Bolded values indicate significant correlations ( $p \leq 0.05$ ).

**Table S4.** Correlation of synaptic mRNAs with clinical variables

| Gene      | Age of onset |             | Duration of illness (yrs) |             | Daily chlor mean |      | Last recorded chlor dose |      | Lifetime chlor |      |
|-----------|--------------|-------------|---------------------------|-------------|------------------|------|--------------------------|------|----------------|------|
|           | r            | p           | r                         | p           | r                | p    | r                        | p    | r              | p    |
| CPLX1     | 0.22         | 0.20        | -0.06                     | 0.73        | 0.01             | 0.97 | -0.23                    | 0.21 | -0.12          | 0.51 |
| VGAT      | 0.00         | 0.99        | <b>-0.39</b>              | <b>0.02</b> | -0.28            | 0.11 | -0.24                    | 0.19 | -0.32          | 0.06 |
| CPLX2     | 0.20         | 0.26        | -0.17                     | 0.32        | 0.12             | 0.50 | -0.13                    | 0.50 | -0.03          | 0.88 |
| VGlut1    | -0.15        | 0.38        | <b>-0.49</b>              | <b>0.00</b> | -0.25            | 0.14 | -0.24                    | 0.18 | -0.32          | 0.06 |
| GAP43     | -0.13        | 0.48        | 0.06                      | 0.74        | -0.09            | 0.60 | -0.07                    | 0.71 | -0.12          | 0.50 |
| NAV1      | -0.13        | 0.46        | -0.10                     | 0.57        | 0.10             | 0.56 | -0.19                    | 0.31 | 0.01           | 0.96 |
| NAV2      | <b>0.35</b>  | <b>0.05</b> | 0.30                      | 0.09        | 0.08             | 0.67 | 0.18                     | 0.34 | 0.08           | 0.66 |
| VAMP1     | 0.13         | 0.47        | 0.23                      | 0.19        | 0.14             | 0.42 | 0.09                     | 0.65 | 0.10           | 0.57 |
| dysbindin | -0.15        | 0.40        | 0.22                      | 0.20        | 0.27             | 0.12 | 0.13                     | 0.47 | 0.22           | 0.21 |

Chlor, chlorpromazine.

Bolded values indicate significant correlations ( $p \leq 0.05$ ).

1. Weickert CS, Sheedy D, Rothmond DA, Dedova I, Fung S, Garrick T, *et al.* (2010): Selection of reference gene expression in a schizophrenia brain cohort. *Aust N Z J Psychiatry* 44: 59-70.
